# Supplementary material for: Time trends between vaccination coverage and voting patterns before and during the COVID-19 pandemic: analysis of COVID-19 and flu surveys in the United States
Source: medRxiv preprint, doi:10.1101/2022.09.05.22279620, version 1 (2022-09-09)
Supplement: Supplemental Material [file 279620_file02.docx]

**SUPPLEMENTARY MATERIAL**

# Time trends between vaccination coverage and voting patterns before and during the COVID-19 pandemic: analysis of COVID-19 and flu surveys in the United States at state- and county-level

Minttu M Rönn1, Nicolas A Menzies1, Joshua A Salomon2

1. Department of Global Health and Population, Harvard T.H. Chan School of Public Health, Boston Massachusetts
2. Center for Health Policy / Center for Primary Care & Outcomes Research**,** Stanford University, Stanford, California

**Table S1.** Description of data surveys included in the analysis.

| Dataset | Vaccination measure | Population | Years | Age | Geography used | Race/ ethnicity | Outcome used | Survey methodology summary |
| --- | --- | --- | --- | --- | --- | --- | --- | --- |
| CDC Surveillance 1 | Covid-19 | Total population | 2020-2022  Ongoing | Total population | State | NA | End of month vaccine uptake coverage at state-level | Administrative Surveillance |
| NIS-ACM 2 | Covid-19 | General non-institutionalized population | 2021-2022  Ongoing | 18+ | State | 5 race/ethnicity groups | Monthly Vaccine uptake coverage at state-level  N.B. Monthly aggregate estimates provided are approximate, and do not necessarily represent a full calendar month (e.g. April 22 – May 29, 2011) | Phone interview |
| NIS-FLU 3 | FLU | General population | 2008-2021  Ongoing | 6 months+ | State | 5 race/ethnicity groups | Last vaccination coverage measure available of each flu season (May) at state-level | Phone interview |
| CTIS4 | Flu  Covid-19 | General population with Facebook account. | 2020-2022 | 18+ | County, State, | 6 race/ethnicity groups | Received any flu or any COVID-19 vaccination  County and State defined by the respondent’s FIPS | Survey administered on Facebook |

**FIGURE S1.** Absolute monthly difference in COVID-19 vaccination coverage, compared at state-level to previous month. Shading represents 2020 vote share for the Democrats. Data: CDC Surveillance

**
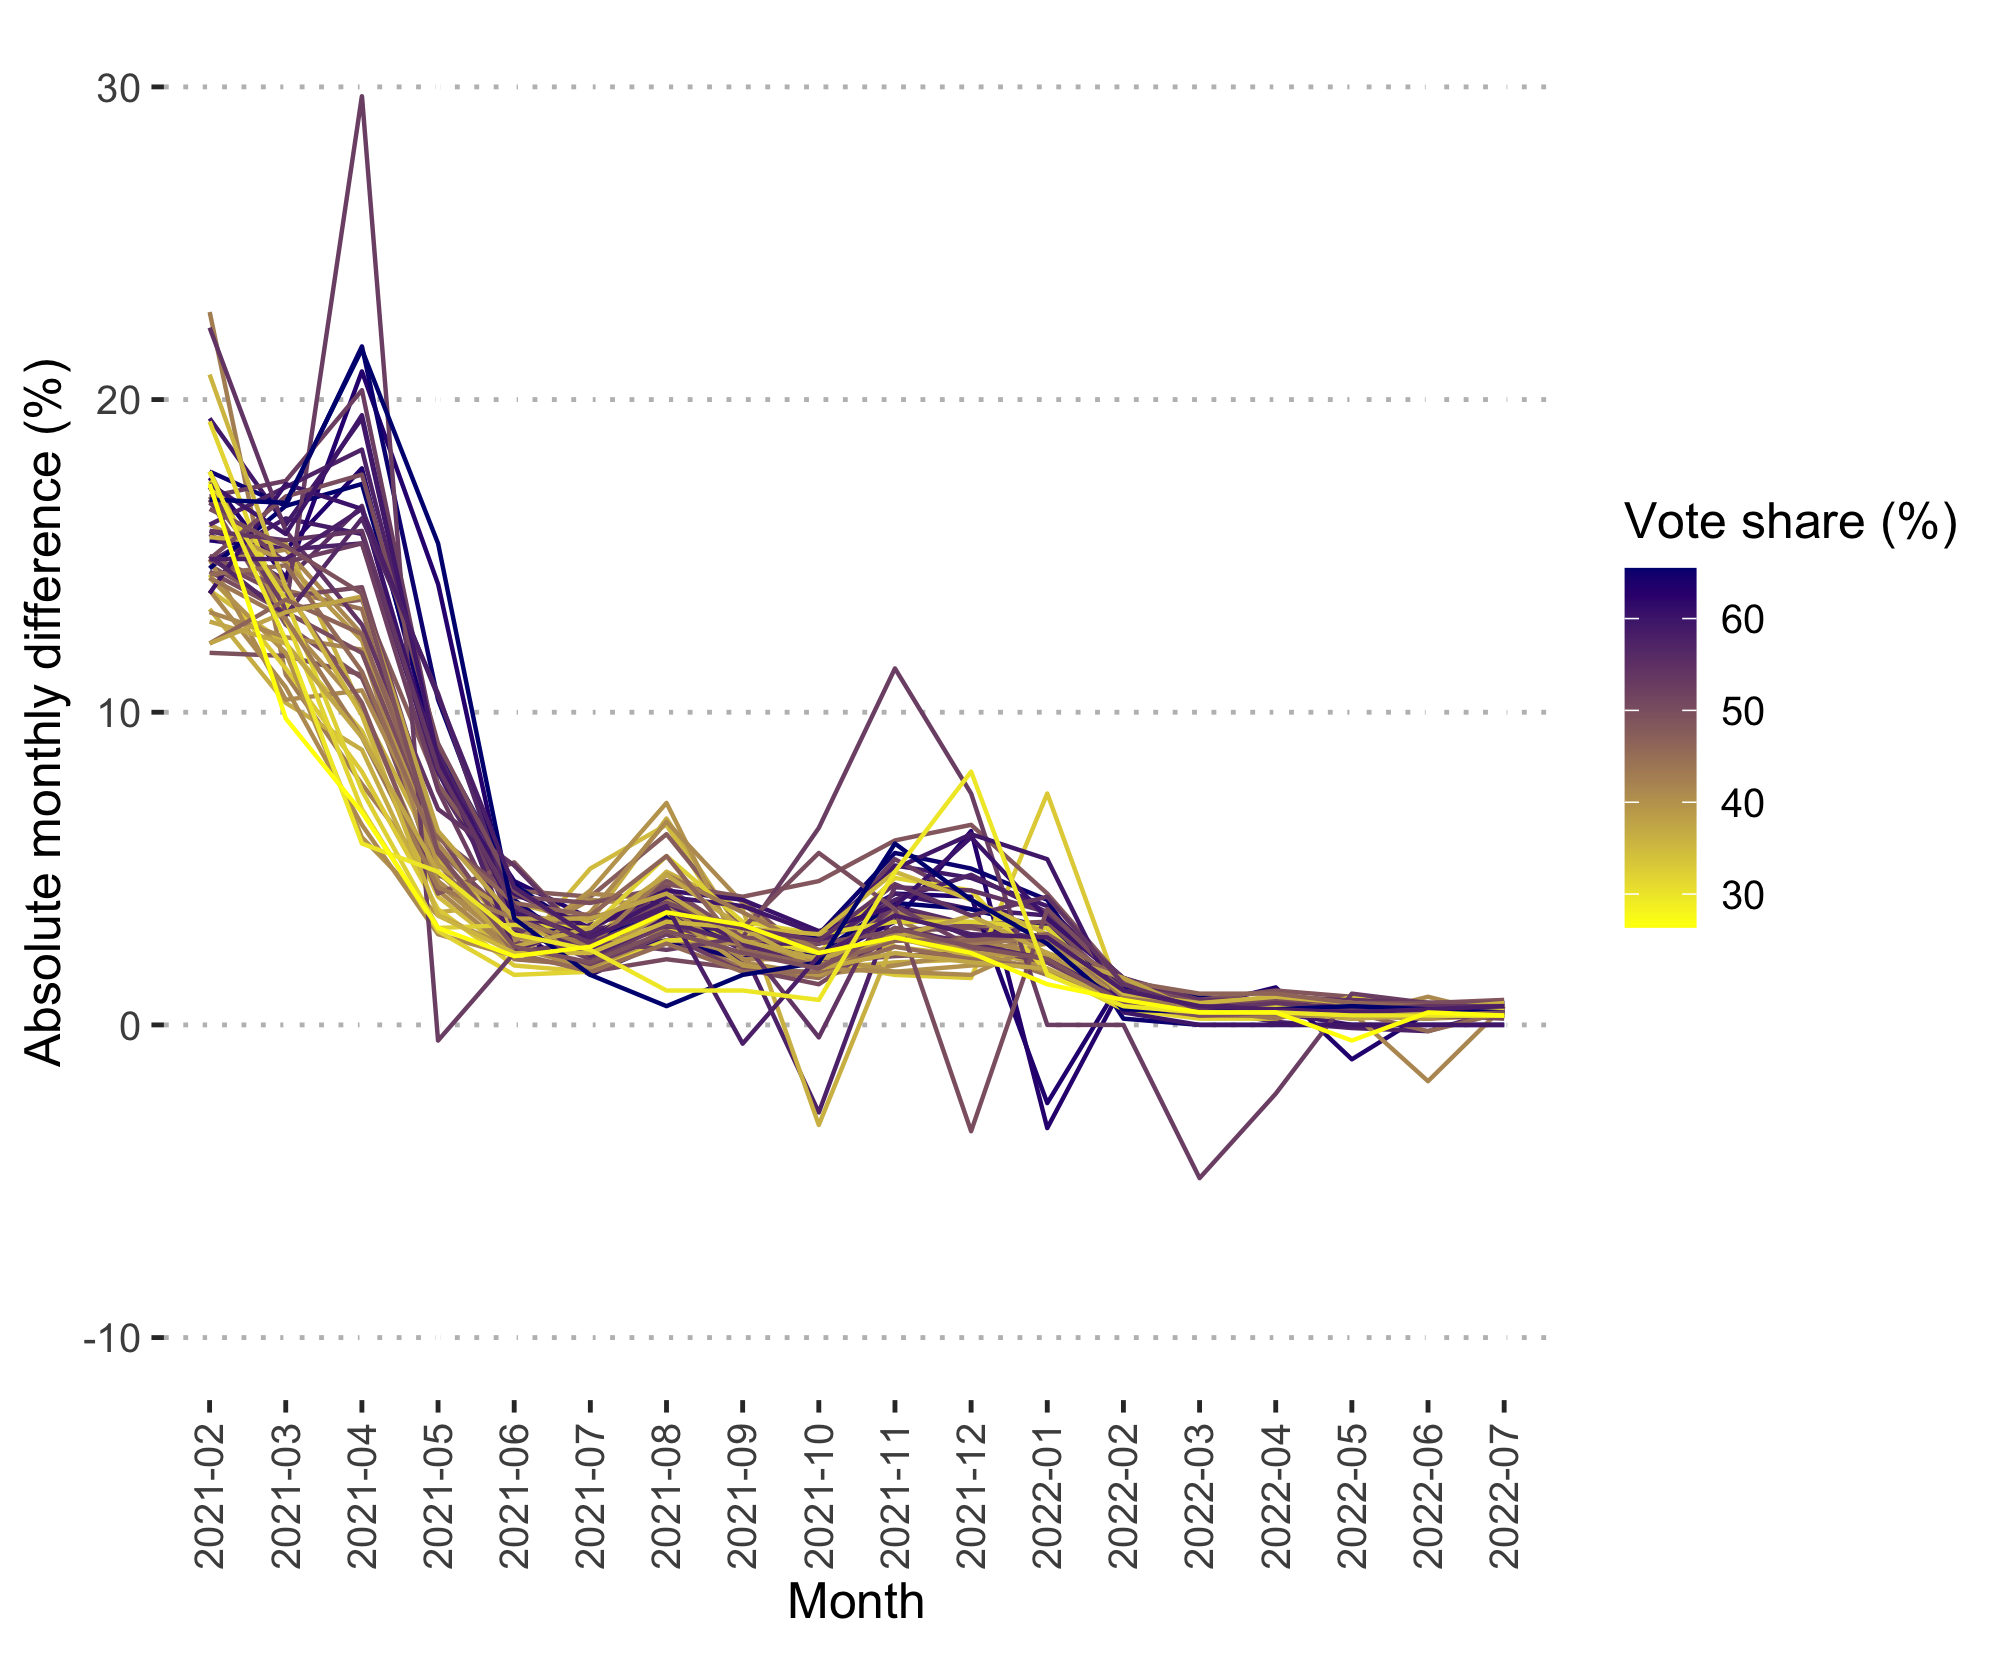
**

**Footnote**

The data are presented as they were reported, and no data cleaning were done to adjust for potential reporting changes and/or errors; e.g. reductions in population level vaccination coverage observed for some states.

**FIGURE S2.** CTIS data vaccination coverage for flu and COVID-19 by state and state’s vote share for the Democratic party in 2020 presidential election. CTIS data for June 2022.

Vaccination status at state-level: expecteda and observed compared to each other.


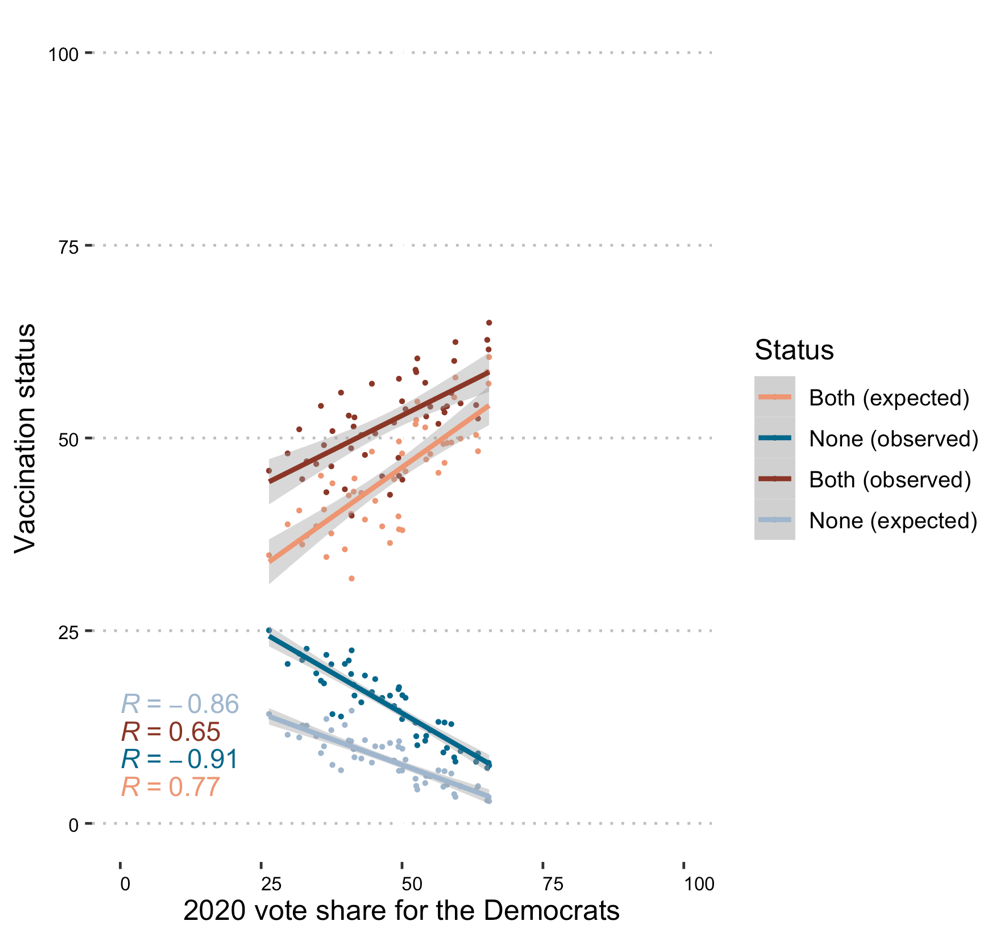


**Footnote**

1. Expected calculated based on individual vaccination coverage assuming independence: coverage of flu vaccine * coverage of COVID-19 vaccine.

Status defined as

Both = received both flu and COVID-19 vaccine

None = has not received flu nor the COVID-19 vaccine

| **FIGURE S3.** State level flu vaccination coverage on y-axis by age (rows) and by HHS region (columns), organized by flu season 2010-2021 (x-axis). HHS regions* are ordered by 2020 vote share: Region 1 has the highest share for Democrats and Region 7 has the lowest vote share. The first flu season (2020-2021) during the COVID-19 pandemic is highlighted with orange. Data: NIS-FLU |
| --- |
| 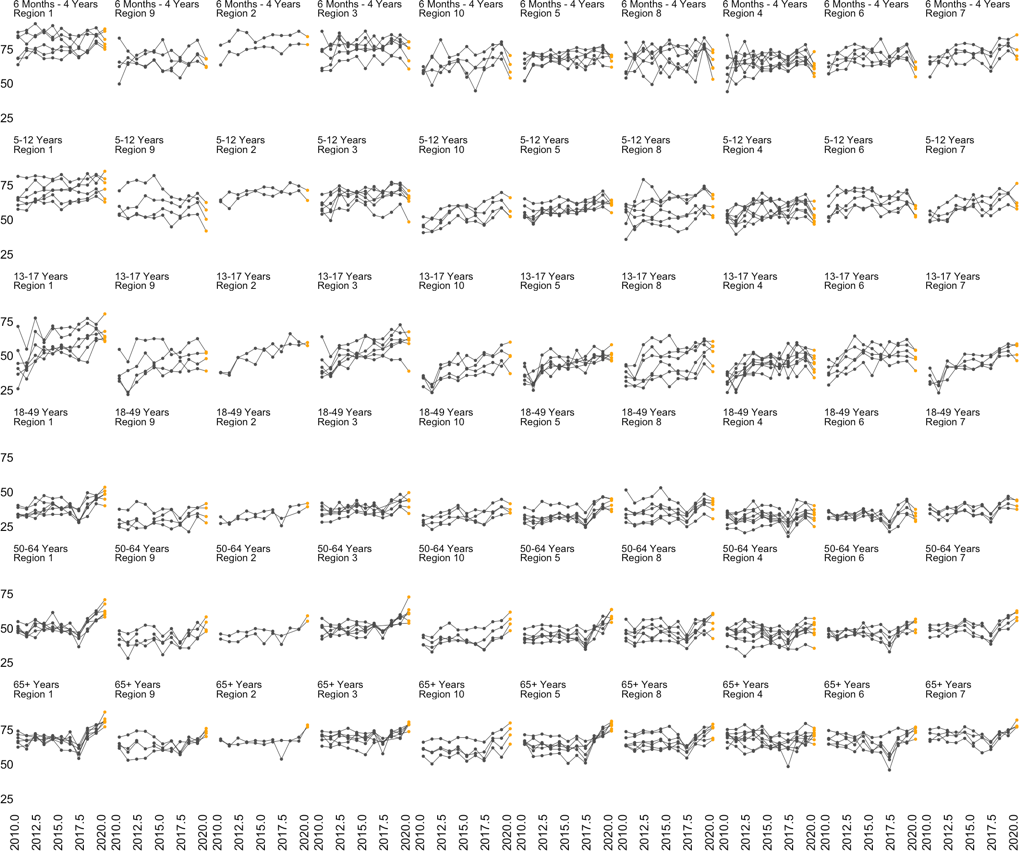 |

***) Footnote of HHS Regions**

Region 1: Connecticut, Maine, Massachusetts, New Hampshire, Rhode Island, and Vermont

Region 2: New Jersey, New York, Puerto Rico, and the Virgin Islands

Region 3: Delaware, District of Columbia, Maryland, Pennsylvania, Virginia, and West Virginia

Region 4: Alabama, Florida, Georgia, Kentucky, Mississippi, North Carolina, South Carolina, and Tennessee

Region 5: Illinois, Indiana, Michigan, Minnesota, Ohio, and Wisconsin

Region 6: Arkansas, Louisiana, New Mexico, Oklahoma, and Texas

Region 7: Iowa, Kansas, Missouri, and Nebraska

Region 8: Colorado, Montana, North Dakota, South Dakota, Utah, and Wyoming

Region 9: Arizona, California, Hawaii, Nevada, American Samoa, Commonwealth of the Northern Mariana Islands, Federated States of Micronesia, Guam, Marshall Islands, and Republic of Palau

Region 10: Alaska, Idaho, Oregon, and Washington

**References**

1 Prevention C for DC and. COVID-19 Vaccinations in the United States,Jurisdiction. Available from:https://data.cdc.gov/Vaccinations/COVID-19-Vaccinations-in-the-United-States-Jurisdi/unsk-b7fc Accessed March 28,2022.

2 Centers for Disease Control and Prevention. National Immunization Survey Adult COVID Module (NIS-ACM): Vaccination Status and Intent by Demographics. Available from:https://data.cdc.gov/Vaccinations/National-Immunization-Survey-Adult-COVID-Module-NI/iwxc-qftf Accessed March 28,2022.

3 Centers for Disease Control and Prevention. Influenza Vaccination Coverage for All Ages (6+ Months). Available from:https://data.cdc.gov/Flu-Vaccinations/Influenza-Vaccination-Coverage-for-All-Ages-6-Mont/vh55-3he6 Accessed March 28,2022.

4 Salomon JA, Reinhart A, Bilinski A, *et al.* The US COVID-19 Trends and Impact Survey: Continuous real-time measurement of COVID-19 symptoms, risks, protective behaviors, testing, and vaccination. *Proc Natl Acad Sci* 2021:118(51):e2111454118.
